1 **Prevalence and Trends in Cardiovascular Risk Factors Among Middle Aged Persons from**  
2 **Five Race and Ethnic Groups in the United States: A Longitudinal Analysis of Two Cohort**  
3 **Studies**

4  
5 Havisha Pedamallu\*, BA<sup>1</sup>, Zeynab Aghabazaz\*, PhD<sup>1</sup>, Nicola Lancki, MPH<sup>1</sup>, Luis A.  
6 Rodriguez, PhD, MPH, RD<sup>2,3,4</sup>, Juned Siddique, DrPH<sup>1</sup>, Meena Moorthy, BA<sup>1</sup>, Nilay S. Shah,  
7 MD, MPH<sup>1</sup>, Norrina B. Allen, PhD<sup>1</sup>, Alka M. Kanaya, MD<sup>2</sup>, Namratha R. Kandula, MD, MPH<sup>1</sup>

8  
9 <sup>1</sup> Northwestern University Feinberg School of Medicine, Chicago, Illinois

10 <sup>2</sup> University of San Francisco in California, San Francisco, California

11 <sup>3</sup> Kaiser Permanente Northern California Division of Research, Oakland, California

12 <sup>4</sup> Kaiser Permanente Bernard J. Tyson School of Medicine, Oakland, California

13

14 \*These authors contributed equally to this work

15

16 **Word Count:** 3,263

17

18 **Corresponding Author:** Namratha R. Kandula, MD, MPH  
19 675 N St Clair St Ste 18-200,  
20 Chicago, IL 60611  
21 Phone: 312-695-8630  
22 Email: n-kandula@northwestern.edu

23

24

25

26

27

28

29  
30  
31  
32  
33  
34  
35  
36  
37  
38  
39  
40  
41  
42

**Key Points (90/100 words)**

**Question:** Do South Asian adults have a higher burden of cardiovascular risk factors at age 45 years compared adults from other race and ethnic groups?

**Findings:** In this study of 2754 adults from two cohort studies, the prevalence of prediabetes and diabetes at age 45 years was higher among South Asians than in Black, Chinese, Hispanic and White adults; hypertension prevalence was higher among South Asians than all groups except Black adults.

**Meaning:** South Asian adults have a higher prevalence of several clinical cardiovascular risk factors at a younger age.

43  
44  
45  
46  
47  
48  
49  
50  
51  
52  
53  
54  
55  
56  
57  
58  
59  
60  
61  
62  
63  
64  
65

**Abstract (348/350 words)**

**Importance:** It is well established that people of South Asian background have a high burden of atherosclerotic cardiovascular disease (ASCVD). However, few studies have comprehensively examined if South Asian adults in the United States (US) develop cardiovascular risk factors at younger ages than adults from other race and ethnic groups.

**Objective:** To compare the prevalence and change in ASCVD risk factors across age strata by race and ethnic group.

**Design:** We combined data from the Mediators of Atherosclerosis in South Asians Living in America (MASALA) and the Multi-Ethnic Study of Atherosclerosis (MESA) cohort studies. Longitudinal data from all eligible participants at all available exam visits were used to estimate the prevalence of risk factors at ages 45 and 55 years for each race and ethnic group.

**Setting:** Multicenter longitudinal cohort study in 7 field centers across the U.S.

**Participants:** The baseline study sample included individuals free of clinical ASCVD; 554 South Asians, 796 White, 588 Black, 517 Hispanic/Latino, and 245 Chinese adults aged 45-55 years were included.

**Exposures:** Self-identified race (Black, Chinese, South Asian, or White) or ethnic group (Hispanic/Latino).

66

67 **Main Outcome(s) and Measure(s):** Prevalence of clinical (prediabetes & diabetes,  
68 hypertension, dyslipidemia, BMI) and behavioral (diet quality, alcohol use, exercise) ASCVD  
69 risk factors at age 45 and age 55.

70

71 **Results:** At age 45, South Asian men and women had the highest prevalence of pre-diabetes and  
72 diabetes and higher prevalence of hypertension compared to White, Chinese, and  
73 Hispanic/Latino men and women. South Asian men had a higher prevalence of dyslipidemia than  
74 White, Chinese, and Black men, and South Asian women had a higher prevalence than Chinese  
75 and Black women. All groups had worse diet quality than South Asian men and women at age  
76 45, and most also had higher rates of alcohol use.

77

78 **Conclusions and Relevance:** We observed significant differences in the prevalence of risk  
79 factors for South Asian adults compared to adults from other U.S. race and ethnic groups at age  
80 45 years. Understanding trends and disparities in cardiovascular risk and protective factors  
81 across the life course can help equitably improve prevention and treatment strategies for US  
82 populations.

83

84

85

86

87

88

89 **INTRODUCTION**

90 South Asian individuals (people who trace their ancestry from Bangladesh, Bhutan, India,  
91 Maldives, Nepal, Pakistan, and Sri Lanka) have high rates of atherosclerotic cardiovascular  
92 disease (ASCVD), with estimates approximating rates 2.5 times higher compared to non-  
93 Hispanic White and East Asian populations<sup>1</sup>. On average, South Asians develop coronary artery  
94 disease (CAD) up to a decade earlier than the average age at which CAD develops in most  
95 people in the United States (US)<sup>2</sup>. A quarter of heart attacks occur under age 40 for South Asians  
96 and 50% occur under age 50. In clinical guidelines, South Asian ancestry is considered a “risk  
97 enhancing factor”<sup>3</sup>.

98 While South Asian in the US have an overall higher prevalence of ASCVD compared to  
99 non-Hispanic White US populations that manifests at younger ages, there is limited research to  
100 know if the prevalence of ASCVD risk factors at younger ages is higher among South Asian  
101 populations compared to other race and ethnic groups. Therefore, the objective of this study was  
102 to combine longitudinal data from the Mediators of Atherosclerosis in South Asians Living in  
103 America (MASALA) study and the Multiethnic Study of Atherosclerosis (MESA) to estimate the  
104 prevalence of cardiovascular risk factors during middle age, and to test whether the prevalence of  
105 these risk factors and their change over time differ between South Asians compared to Black,  
106 Chinese, Hispanic/Latino and White adults. If South Asians develop ASCVD risk factors at  
107 younger ages than other race and ethnic groups, this finding could lead to earlier screening,  
108 prevention, and treatment for this at-risk group.

109

110

111

112 **METHODS**

113 **Study Population.** This study was conducted using longitudinal data from all available  
114 exams of the Mediators of Atherosclerosis in South Asians Living in America (MASALA) and  
115 the Multi-Ethnic Study of Atherosclerosis (MESA) studies, which are both multicenter  
116 prospective cohort studies examining the development and determinants of clinical ASCVD risk  
117 factors, subclinical ASCVD, and ASCVD outcomes.

118 The study design for MASALA has been published elsewhere<sup>4</sup>. Briefly, MASALA  
119 included 1164 South Asian (defined as those with Indian, Pakistani, Bangladeshi, Nepali, and Sri  
120 Lankan ancestry) participants who were CVD free between 40 to 84 years of age recruited  
121 through two field centers in San Francisco, CA and Chicago, IL; Data were collected at baseline  
122 (Exam 1) for 906 participants in 2010-2013 with follow up Exam 2 data collection in 2016-2018  
123 for 748 participants. An additional 258 participants were recruited in 2017-2018 and their  
124 baseline (Exam 1A) data are included.

125 The study design for MESA has also been published<sup>5</sup>. Briefly, MESA included 6,814  
126 White, Black, Hispanic/Latino, and Chinese men and women free from clinical CVD between  
127 45-84 years of age. Baseline exam 1 data were collected between 2000-2002 with repeat  
128 examinations every 2 years. There have been 6 exams, the most recent being 2016-2018.  
129 Participants were recruited through 6 field centers: Forsyth County, NC; Northern Manhattan and  
130 the Bronx, NY; Baltimore City and Baltimore County, MD; St. Paul, MN; Chicago and the  
131 village of Maywood, IL; and Los Angeles County, CA.

132 **Study Sample and Exclusion Criteria.** The analysis was restricted to participants  
133 between ages 45 to 55 at the baseline exam to minimize bias related to the cohorts' inclusion  
134 criteria of being free from ASCVD at baseline. It is likely that the older individuals enrolled in

135 MASALA and MESA may not be representative of the general older population since they were  
136 required to be free of clinical symptoms of ASCVD and ASCVD is more common at older ages.  
137 Therefore, we included 554 South Asians from the MASALA study and 796 White, 588 Black,  
138 517 Hispanic/Latino, and 245 Chinese adults from the MESA study. Harmonized data from  
139 MASALA Exams 1/1A and 2 and MESA Exams 1 through 6 were combined. On average, our  
140 data set consisted of 3.3 exams per MESA participant and 1.4 exams per MASALA participant.

141 **Primary Exposure.** The primary exposure was self-reported race (Black, Chinese, South  
142 Asian, or White) or ethnic group (Hispanic/Latino).

143 **Primary Outcome.** The primary outcomes were clinical and behavioral ASCVD risk  
144 factors. These risk factors were chosen based on prior research establishing important risk factors  
145 in the development of ASCVD and the American Heart Association's Life's Essential 8<sup>6</sup>. Risk  
146 factor definitions were previously harmonized between the two data sets using a standardized set  
147 of definitions<sup>7-9</sup>. All risk factors were available at all exams, except diet and exercise at MESA  
148 exam 4. Diet was assessed for 87% of MESA participants at Exam 1, 72% of MESA participants  
149 at exam 5, 99% of MASALA participants at Exam 1, and 71% of MASALA participants at Exam  
150 2.

151 Clinical risk factors include hypertension, pre-diabetes or diabetes status, dyslipidemia,  
152 and body mass index (BMI). Hypertension was defined as having a systolic blood pressure  
153  $\geq 140$  mmHg, diastolic blood pressure  $\geq 90$  mmHg, or use of any antihypertensive medication  
154 according to guidelines in use at the time of the baseline exam<sup>10</sup>. Prediabetes was defined as  
155 having a fasting plasma glucose level between 100 and 125 mg/dL. Diabetes status was defined  
156 by self-reported use of glucose-lowering medications or fasting plasma glucose  $\geq 126$  mg/dL<sup>11</sup>.  
157 Dyslipidemia was determined using standard lipid level cut points (total cholesterol  $\geq 200$

158 mg/dL, low-density lipoprotein  $\geq 160$  mg/dL, triglycerides  $\geq 150$  mg/dL, or high-density  
159 lipoprotein  $< 40$  mg/dL) using blood samples or self-report of currently taking lipid lowering  
160 therapy- statin/fibrate/niacin<sup>12</sup>. BMI was calculated using weight and height measurements at  
161 each exam visit and was treated as a continuous variable in the analysis. BMI at Exam 1 was  
162 reported as a categorical variable using race and ethnic group-specific cut-points (Chinese and  
163 South Asian Individuals: underweight BMI  $< 18.5$ , normal BMI 18.5 to 22.9, overweight 23 to  
164 24.9, and obese BMI  $\geq 25$ ; All others: underweight BMI  $< 18.5$ , normal BMI 18.5 to 24.9,  
165 overweight 25 to 29.9, and obese BMI  $\geq 30$ )<sup>13, 14</sup>.

166 Behavioral risk factors included alcohol use, physical activity level, and diet quality.  
167 Alcohol use was defined as currently drinking 1 or more drinks per week. Participants reported  
168 exercise using the Typical Week's Physical Activity Questionnaire which was quantified as MET  
169 minutes/week<sup>15</sup>. Diet quality was determined by calculating the Alternative Health Eating Index-  
170 2010 (AHEI) score<sup>9</sup>. This is a dietary quality index that predicts the risk of chronic disease based  
171 on nutrient and food intake, with a range between 0 (worst) to 110 (best) points<sup>9</sup>.

172 **Statistical Analysis.** Baseline characteristics (age, smoking status, education, insurance  
173 status, BMI) were calculated for each race and ethnic group. Comparisons across groups were  
174 tested using one-way ANOVAs for continuous variables and chi-squared tests of independence  
175 for categorical variables.

176 Our estimands of interest are the risk factor prevalences (for binary outcomes) or means  
177 (for continuous outcomes) at age 45 and their change over 10 years for each race and ethnic  
178 group and their differences between race and ethnic groups.

179 Using data from all eligible MESA and MASALA participants, we modeled clinical and  
180 behavioral risk factors as a function of age using mixed-effects linear regression models for



181 continuous outcomes (BMI, physical activity, diet quality) and mixed-effects logistic regression  
182 models for binary outcomes (all other outcomes). Smoking status was not modeled as a  
183 longitudinal risk factor because it tended not to vary over time and cannot be modeled at age 45  
184 and 55. All models controlled for baseline education and baseline insurance status and were fit  
185 separately by risk factor and sex.

186 To estimate risk factor prevalences at age 45 and their 10-year change, we used the  
187 method of marginal predicted means<sup>16</sup> - the average value of the outcome averaging over all  
188 covariates—to estimate the prevalence of each risk factor at ages 45 and 55 for each race and  
189 ethnic group. These marginal predicted means were obtained from our mixed-effects models that  
190 use data from all eligible MESA and MASALA participants.

191 To compare risk factor prevalence between South Asians and the other race and ethnic  
192 groups, we first performed—separately by risk factor—an overall test at age 45 of whether the  
193 South Asian prevalence was significantly different from any of the other race and ethnic groups.  
194 If that test was significant, we subsequently performed the four pairwise tests comparing South  
195 Asians to each of the other race and ethnic groups.

196 To test if the change in risk factors between ages 45 and 55 differed for South Asians  
197 compared to the other groups, we calculated the difference (slope) between marginal means at  
198 ages 45 and 55 (i.e 55 minus 45) for all five race and ethnic groups. Then, we again performed  
199 an overall test of whether the South Asian slope was significantly different from the slopes of  
200 any of the other race and ethnic groups. If this test was significant, we then performed the four  
201 pairwise tests comparing the South Asian slope to the slope of each race and ethnic group. More  
202 information on estimation of risk factor prevalences, their change over time, and their  
203 comparison across race and ethnic groups is included in the Appendix. Since this is an

204 exploratory analysis of observational data, we did not correct for multiple comparisons. All  
205 analyses and post-estimation processing were performed using STATA version 18.0<sup>17</sup>.

## 206 RESULTS

207 **Baseline Characteristics.** The average age of South Asian participants was 48.5 years at  
208 the baseline exam which was similar when compared to the other race and ethnic groups (Table  
209 1). South Asian participants overall had higher education levels compared to the other race and  
210 ethnic groups. A majority (60.8%) of South Asians had more than a college level education  
211 compared to 32.9% of White participants, the next highest educated group. South Asians also  
212 had the highest never smoking prevalence (85.2%) at baseline with Chinese adults having a  
213 slightly lower prevalence (76.7%). Hispanic/Latino (53.0%), Black (48.0%), and White (45.5%)  
214 had much lower never smoking prevalences in comparison. A higher proportion of South Asian  
215 (86.8%), White (91.7%), and Black (81.0%) participants had private insurance compared to  
216 Chinese (68.2%) and Hispanic/Latino (67.3%) participants. When using race and ethnic group-  
217 specific BMI cut points, 20.9% of South Asian, 34.6% of White, 35.5% of Chinese, 15.8% of  
218 Black, and 16.1% of Latino participants had an underweight or normal BMI,

219 **Risk Factor Prevalence at Age 45 among Men.** South Asian men had the highest  
220 prevalence of pre-diabetes and diabetes (41.8%; Table 2) when compared to men of all other  
221 groups (White: 7.2%, Chinese: 18.9%, Black: 16.0%, Hispanic/Latino: 14.7%;  $p < 0.001$ ). They  
222 had a significantly greater prevalence of hypertension compared to Chinese and Hispanic/Latino  
223 men and a significantly greater prevalence of dyslipidemia compared to Black men. They also  
224 had a significantly lower BMI than White, Black, and Hispanic/Latino men. South Asian men  
225 had significantly higher diet quality scores compared to men of all other race and ethnic groups

226 (Table 4). They also had significantly lower alcohol use than Chinese men and higher level of  
227 exercise than White and Chinese men.

228 **Trends Across Age Among Men.** There were no significantly different changes in  
229 prevalence of clinical risk factors between age 45 and 55 for South Asian men versus men from  
230 the other groups, with the exception of White men having a smaller increase in the prevalence of  
231 hypertension between age 45 and 55 (21.9% for South Asian men, 11.6% for White men,  $p =$   
232 0.05). Among the behavioral risk factors, White men also had a larger improvement in AHEI diet  
233 score (7.1) than South Asian men (3.4,  $p = 0.006$ ) over time. Chinese men had a larger increase  
234 in exercise (1605 MET min/wk) than South Asian men (355 MET min/wk,  $p = 0.011$ ).

235 **Risk Factor Prevalence at Age 45 among Women.** Similar to South Asian men, South  
236 Asian women had the highest prevalence of pre-diabetes and diabetes of women of all race and  
237 ethnic groups (Table 3). South Asian women also had the highest hypertension prevalence, and a  
238 significantly higher prevalence of dyslipidemia compared to Chinese and Black women. BMI  
239 among South Asian women was significantly higher than BMI in Chinese women and  
240 significantly lower than Black and Hispanic/Latino women. South Asian women had the highest  
241 AHEI score (68.5) of all groups (White: 51.5, Chinese: 58.6, Black: 47.7, Hispanic/Latino: 50.3),  
242 the lowest alcohol use, and the most exercise.

243 **Trends Across Age Among Women.** South Asian women had a significantly smaller  
244 increase in HTN prevalence (4.7%) from age 45 to 55 compared to Chinese (17.2%,  $p < 0.01$ ),  
245 Black (31.0%,  $p < 0.001$ ), and Latina (14.9%,  $p < 0.01$ ) women. South Asian women had larger  
246 increases in BMI (2.0) compared to White (1.0,  $p = 0.018$ ) and Chinese (-0.2,  $p < 0.001$ ) women.  
247 White women had a larger increase in AHEI diet score (7.0) compared to South Asian women

248 (3.4,  $p = 0.006$ ). In addition, Black women had a larger increase in exercise (962 MET min/wk)  
249 than South Asian women (203 MET min/wk).

## 250 **DISCUSSION**

251 **Principal Findings.** In this longitudinal multi-race and ethnic population-based cohort  
252 study of 2,700 adults ages 45-55 at baseline in the U.S., we observed significant differences in  
253 the prevalence of risk factors for South Asians compared to other U.S. race and ethnic groups at  
254 age 45 years. At age 45, South Asian adults had a higher prevalence of prediabetes, diabetes, and  
255 hypertension than White adults. Namely, the prevalence of pre-diabetes and diabetes among  
256 South Asian men and women is almost twice the prevalence of Black and White individuals.  
257 Despite observing a higher prevalence of clinical risk factors among South Asian adults at 45  
258 years, we also found that South Asian adults had the highest (i.e. best) diet quality of all race and  
259 ethnic groups, as well as lower alcohol use and higher exercise levels than most other groups.  
260 Interestingly, these findings differ from past research showing that South Asians are less likely  
261 to meet physical activity recommendations and eat less healthful diets.<sup>18</sup> However, prior studies  
262 included participants across the adult lifespan, and the present analysis only included South  
263 Asian adults during middle-age who we found to have more cardioprotective behaviors.

264 **Secondary Findings.** Overall, it appears that as age increases, the prevalence of clinical  
265 risk factors increases significantly among men and women. However, as age increased, we also  
266 observed a favorable increase in diet quality among all groups and exercise in all groups except  
267 for South Asian women. These findings indicate that the increase in ASCVD risk factors among  
268 South Asians as they age is in alignment with other groups, but that South Asians may develop  
269 some risk factors earlier than other groups. In addition, while health behaviors improved with

270 age among White, Black, Hispanic/Latino, and Chinese adults, the same level of improvement  
271 was not seen among South Asian adults.

272         There are multiple factors that could be contributing to this trend. For example, there may  
273 be social and cultural underpinnings to differences in health behaviors as individuals age. The  
274 majority of middle- and older-age South Asians in the US are immigrants, and immigration and  
275 acculturation have been shown to impact diet and physical activity<sup>19-21</sup>. Language and cultural  
276 barriers may also contribute to reduced health literacy among South Asians living in the U.S. and  
277 preventive health messaging reaching other race and ethnic groups may not be reaching South  
278 Asians effectively<sup>22</sup>. In addition, clinical ASCVD risk factors are chronic health conditions  
279 which are associated with disability and functional decline. The increased burden of ASCVD risk  
280 factors among South Asians in middle-age compared to other groups may be impacting their  
281 ability to engage in positive health behaviors like increased physical activity.

282         Previous studies have shown that the number of positive health behaviors at middle-age  
283 is associated with less frailty at older ages<sup>23</sup>. In addition, increasing the number of positive health  
284 behaviors a person engages in during middle-age is associated with a lower risk of frailty<sup>23</sup>.  
285 Given this finding, strategies to enhance healthy behaviors among aging South Asian adults may  
286 be needed to reduce disparities. Future studies should replicate this study design in younger  
287 populations to determine the prevalence of clinical and behavioral cardiovascular risk factors  
288 prior to middle-age and how behavioral and clinical risk factors may change over time to  
289 influence ASCVD outcomes. It is possible that health behaviors at younger ages are more  
290 predictive of health status at older ages compared to behaviors at middle-age.

291         **Implications.** This is the first study, to our knowledge, to show that the increased burden  
292 of ASCVD in South Asians may be attributed to a higher prevalence of clinical risk factors at

293 younger ages. The results of this study indicate that screening and prevention of ASCVD risk  
294 must begin early for people of South Asian background given the increased burden of risk factors  
295 at younger ages. Despite having the highest diet quality of all the groups included in this study  
296 and high levels of exercise at younger ages, South Asians still had a high prevalence of ASCVD  
297 risk factors at young ages, especially diabetes and hypertension. Determining the age at which  
298 risk factors screening, prevention strategies, and treatment can optimize health outcomes for  
299 South Asian adults is fundamental to addressing their increased ASCVD risk.

300 **Limitations.** In this study, participants had to be free of cardiovascular disease when they  
301 were enrolled in the study, so this data is potentially excluding individuals who may have early  
302 ASCVD and could add to the burden of risk factors. Also, whereas MASALA and MESA offer  
303 longitudinal information regarding patient populations that have been traditionally  
304 underrepresented in research, the participants in these studies are likely not fully representative  
305 of all people of that race or ethnic group living in the United States. For example, MASALA  
306 only recruited from two study sites, all of which are large urban areas, excluding many  
307 individuals who may add more diversity to the data collected. In addition, longitudinal data  
308 heavily relies on patient follow up. Participants with higher educational attainment, have higher  
309 socioeconomic status, and have higher health motivation will be more likely to follow up<sup>24</sup>. It is  
310 also likely that differences between participants in MESA and MASALA are confounded by time  
311 period-based differences, as there is a decade difference between the baseline exams of both  
312 studies.

313 **Conclusions.** This study suggests that South Asians have a higher prevalence of several  
314 clinical risk factors at age 45, while having more favorable cardiovascular health behaviors,  
315 compared to other race and ethnic groups. Given the relatively high observed burden of clinical

316 risk factors in South Asians, future studies should examine the development of risk factors  
317 among younger South Asians to better characterize the development and burden of risk earlier in  
318 the life course. Given that heterogeneity in risk factors already existed at age 45, future studies  
319 should aim to examine the entire life course and identify critical time periods where the burden  
320 of risk factors stratifies.

321 Further research is needed to identify mechanisms of the higher observed burden of  
322 clinical risk factors among U.S. South Asians at younger ages despite more favorable  
323 cardiovascular health behaviors. Understanding trends and disparities in risk and protective  
324 factors across the life course can help equitably improve prevention and treatment strategies for  
325 US populations.

## 326 **ACKNOWLEDGEMENTS**

327 The authors thank the other investigators, the staff, and the participants of the MESA and  
328 MASALA studies for their valuable contributions.

329 **Funding Sources:** The MESA study was supported by contracts N01-HC-95159, N01-HC-  
330 95160, N01-HC-95161, N01-HC-95162, N01-HC-95163, N01-HC-95164, N01-HC-95165, N01-  
331 HC-95166, N01-HC-95167, N01-HC-95168 and N01-HC-95169 from the National Heart, Lung,  
332 and Blood Institute and by grants UL1-TR-000040, UL1 TR 001079 and UL1-RR-025005 from  
333 NCRR. The MASALA study was supported by Grants R01HL093009 and R01HL120725 from  
334 the National Heart, Lung, and Blood Institute, the National Center for Research Resources, and  
335 the National Center for Advancing Translational Sciences, the National Institutes of Health  
336 (NIH); and through the UCSF-CTSI Grants UL1RR024131 and UL1TR001872.

337 **Human Subjects Statement:** The Multi-Ethnic Study of Atherosclerosis (MESA) was approved  
338 by the institutional review boards at each of the study sites.

**Table 1:** Baseline Characteristics at Exam 1, MASALA and MESA studies. Values are N (%) unless otherwise reported.

|                     | South Asian<br>(n =554) | White<br>(n = 796) | Chinese<br>(n = 245) | Black<br>(n = 588) | Hispanic/Latino<br>(n = 517) | P-value |
|---------------------|-------------------------|--------------------|----------------------|--------------------|------------------------------|---------|
| Age, Mean (SD)      | 48.5 (4.4)              | 50.4 (3.1)         | 50.1 (3.2)           | 50.3 (3.0)         | 49.9 (3.3)                   | <0.001  |
| Sex                 |                         |                    |                      |                    |                              | 0.665   |
| Female              | 287 (51.8)              | 426 (53.5)         | 125 (51.0)           | 325 (55.3)         | 267 (51.6)                   |         |
| Male                | 267 (48.2)              | 370 (46.5)         | 120 (49.0)           | 263 (44.7)         | 250 (48.4)                   |         |
| Education           |                         |                    |                      |                    |                              | <0.001  |
| < HS                | 15 (2.7)                | 11 (1.4)           | 40 (16.3)            | 34 (5.8)           | 170 (32.9)                   |         |
| HS                  | 22 (4.0)                | 75 (9.4)           | 35 (14.3)            | 90 (15.3)          | 101 (19.5)                   |         |
| < College           | 30 (5.4)                | 239 (30.0)         | 49 (20.0)            | 235 (34.0)         | 178 (34.4)                   |         |
| College             | 150 (27.1)              | 208 (26.1)         | 65 (26.5)            | 133 (22.6)         | 40 (7.7)                     |         |
| > College           | 337 (60.8)              | 262 (32.9)         | 56 (22.9)            | 93 (15.8)          | 28 (5.4)                     |         |
| Missing             | 0                       | 1 (0.1)            | 0                    | 3 (0.5)            | 0                            |         |
| Insurance           |                         |                    |                      |                    |                              | <0.001  |
| None                | 48 (8.7)                | 30 (3.8)           | 60 (24.5)            | 70 (11.9)          | 123 (23.8)                   |         |
| Public              | 25 (4.5)                | 35 (4.4)           | 18 (7.4)             | 39 (6.6)           | 46 (8.9)                     |         |
| Private             | 481 (86.8)              | 730 (91.7)         | 167 (68.2)           | 476 (81.0)         | 348 (67.3)                   |         |
| Missing             | 0                       | 1 (0.1)            | 0                    | 3 (0.51)           | 0                            |         |
| BMI                 |                         |                    |                      |                    |                              | <0.001  |
| Under/Normal weight | 116 (20.9)              | 275 (34.6)         | 87 (35.5)            | 93 (15.8)          | 83 (16.1)                    |         |
| Overweight          | 110 (19.9)              | 276 (34.7)         | 65 (26.5)            | 197 (33.5)         | 226 (43.7)                   |         |
| Obese               | 328 (59.2)              | 245 (30.8)         | 93 (38.0)            | 298 (50.7)         | 208 (40.2)                   |         |
| Smoking             |                         |                    |                      |                    |                              | <0.001  |
| Never               | 472 (85.2)              | 362 (45.48)        | 188 (76.73)          | 282 (47.96)        | 274 (53.00)                  |         |
| Former              | 63 (11.4)               | 297 (37.31)        | 39 (15.92)           | 165 (28.06)        | 133 (25.73)                  |         |
| Current             | 19 (3.43)               | 136 (17.09)        | 18 (7.35)            | 138 (23.47)        | 110 (21.28)                  |         |
| Missing             | 0                       | 1 (0.13)           | 0                    | 3 (0.51)           | 0                            |         |



**Table 2: Clinical Risk Factors Stratified by Age and Race and Ethnic Group in Men, MASALA vs. MESA Groups**

|                                       | Age<br>45 | Group vs SA at age<br>45 (CI) | P-value* | Age<br>55 | Change from age<br>45 to 55 (CI) | Difference in<br>Change (CI) | P-value** |
|---------------------------------------|-----------|-------------------------------|----------|-----------|----------------------------------|------------------------------|-----------|
| <u>Pre-diabetes &amp; Diabetes(%)</u> |           |                               |          |           |                                  |                              |           |
| South Asian                           | 41.8      | (Ref)                         |          | 69.4      | 27.6 (18.9,36.4)                 | (Ref)                        | 0.374     |
| White                                 | 7.2       | -34.6 (-43.3,-25.9)           | <0.001   | 27.8      | 20.6 (17.3,24.0)                 | -7.0 (-16.4,2.4)             |           |
| Chinese                               | 18.9      | -22.9 (-34.8,-11.0)           | <0.001   | 35.6      | 16.7 (8.2,25.3)                  | -10.9 (-23.4,1.5)            |           |
| Black                                 | 16.0      | -25.7 (-36.3,-15.2)           | <0.001   | 33.3      | 17.2 (10.8,23.7)                 | -10.3 (-21.4,0.7)            |           |
| Hispanic/Latino                       | 14.7      | -27.0 (-37.6,-16.4)           | <0.001   | 36.5      | 21.7 (15.5,28.0)                 | -5.9 (-16.7,5.0)             |           |
| <u>Hypertension(%)</u>                |           |                               |          |           |                                  |                              |           |
| South Asian                           | 25.2      | (Ref)                         |          | 47.2      | 21.9 (12.7,31.1)                 | (Ref)                        | 0.050     |
| White                                 | 18.7      | -6.5 (-13.0,-0.1)             | 0.047    | 30.3      | 11.6 (6.3,16.9)                  | -10.3 (-20.6,0.0)            | 0.649     |
| Chinese                               | 6.7       | -18.5 (-25.2,-11.9)           | < 0.001  | 26.2      | 19.4 (14.1,24.8)                 | -2.5 (-13.1,8.2)             | 0.642     |
| Black                                 | 27.7      | 2.5 (-3.3,8.3)                | 0.401    | 52.4      | 24.6 (18.0,31.2)                 | 2.7 (-8.6,14.0)              | 0.464     |
| Hispanic/Latino                       | 10.9      | -14.3 (-21.5,-7.2)            | <0.001   | 28.9      | 18.0 (12.4,23.5)                 | -3.9 (-14.5,6.6)             |           |
| <u>Dyslipidemia(%)</u>                |           |                               |          |           |                                  |                              |           |
| South Asian                           | 78.5      | (Ref)                         |          | 83.0      | 4.4 (-2.8,11.8)                  | (Ref)                        | 0.307     |
| White                                 | 73.7      | -4.7 (-12.2,2.7)              | 0.213    | 76.3      | 2.5 (-2.7,7.7)                   | -1.9 (-10.9,7.0)             |           |
| Chinese                               | 67.3      | -11.2 (-22.4,0.1)             | 0.051    | 71.1      | 3.8 (-5.8,13.4)                  | -0.6 (-12.8,11.3)            |           |
| Black                                 | 59.4      | -19.0 (-2.9,-8.5)             | <0.001   | 69.9      | 10.4 (1.6,19.2)                  | 5.9 (-5.5,17.3)              |           |
| Hispanic/Latino                       | 79.2      | 0.7 (-7.9,9.3)                | 0.869    | 77.8      | -1.4 (-7.8,5.0)                  | -5.9 (-15.6,3.8)             |           |
| <u>BMI (kg/m<sup>2</sup>)</u>         |           |                               |          |           |                                  |                              |           |
| South Asian                           | 26.4      | (Ref)                         |          | 27.0      | 0.7 (0.1,1.2)                    | (Ref)                        | 0.213     |
| White                                 | 27.7      | 1.3 (0.6,2.1)                 | <0.001   | 28.6      | 0.9 (0.7,1.2)                    | 0.3 (-0.3,0.9)               |           |
| Chinese                               | 24.5      | -1.9 (-2.9,-0.8)              | <0.001   | 25.1      | 0.5 (0.1,1.0)                    | -0.1 (-0.8,0.6)              |           |
| Black                                 | 28.3      | 1.9 (1.1,2.8)                 | <0.001   | 29.5      | 1.2 (0.8,1.5)                    | 0.5 (-0.1,1.1)               |           |
| Hispanic/Latino                       | 28.4      | 2.1 (1.1,3.0)                 | <0.001   | 29.2      | 0.8 (0.5,1.1)                    | 0.3 (-0.5,0.8)               |           |

\* P-value < 0.05 from a pairwise test at age 45 vs. South Asians; \*\* P-value from a test of change from age 45 to 55 vs. South Asian. When the multivariate test was not significant, pairwise tests were not performed.

**Table 3: Clinical Risk Factors Stratified by Age and Race and Ethnic Group in Women, MASALA vs. MESA Groups**

|                                        | Age<br>45 | Group vs SA at age<br>45 (CI) | P-value* | Age<br>55 | Change from age<br>45 to 55 (CI) | Difference in<br>Change (CI) | P-value** |
|----------------------------------------|-----------|-------------------------------|----------|-----------|----------------------------------|------------------------------|-----------|
| <u>Pre-diabetes &amp; Diabetes (%)</u> |           |                               |          |           |                                  |                              |           |
| South Asian                            | 27.2      | (Ref)                         |          | 45.4      | 18.2 (10.1,26.3)                 | (Ref)                        | 0.150     |
| White                                  | 8.1       | -19.1 (-24.2,-13.9)           | <0.001   | 19.8      | 11.7 (8.1,15.2)                  | -6.6 (-15.5,2.4)             | 0.444     |
| Chinese                                | 5.8       | -21.4 (-26.9,-15.8)           | <0.001   | 27.6      | 21.8 (17.5,26.1)                 | 3.5 (-5.6,12.7)              | 0.054     |
| Black                                  | 17.4      | -9.7 (-16.3,-3.2)             | 0.003    | 26.4      | 9.0 (0.039,14.0)                 | -9.3 (-18.7,0.1)             | 0.400     |
| Hispanic/Latino                        | 8.1       | -19.1 (-24.8,-13.3)           | <0.001   | 30.2      | 22.1 (17.8,26.4)                 | 3.9 (-5.2,13.0)              |           |
| <u>Hypertension(%)</u>                 |           |                               |          |           |                                  |                              |           |
| South Asian                            | 24.6      | (Ref)                         |          | 29.3      | 4.7 (0.1,9.2)                    | (Ref)                        |           |
| White                                  | 18.6      | -6.0 (-11.8,-0.3)             | 0.040    | 28.5      | 9.8 (5.5,14.3)                   | 52 (-1.0,11.3)               | 0.095     |
| Chinese                                | 7.5       | -17.1 (-24.6,-9.6)            | <0.001   | 24.7      | 17.2 (10.9,23.5)                 | 12.4 (4.7,20.3)              | 0.002     |
| Black                                  | 30.1      | 5.5 (0.1,10.9)                | 0.047    | 61.2      | 31.0 (26.1,36.0)                 | 26.4 (19.5,33.2)             | <0.001    |
| Hispanic/Latino                        | 15.1      | -9.5 (-16.7,-2.3)             | 0.010    | 30.0      | 14.9 (9.1,20.8)                  | 10.2 (3.0,17.4)              | 0.005     |
| <u>Dyslipidemia(%)</u>                 |           |                               |          |           |                                  |                              |           |
| South Asian                            | 54.3      | (Ref)                         |          | 74.7      | 20.4 (11.0,29.8)                 | (Ref)                        | 0.147     |
| White                                  | 55.5      | 1.2 (-9.6,12.0)               | 0.827    | 71.4      | 15.9 (8.9,22.9)                  | -4.5 (-16.2,7.1)             |           |
| Chinese                                | 39.4      | -14.9 (-29.4,-0.3)            | 0.046    | 68.6      | 29.2 (17.0,41.4)                 | 8.8 (-6.6,24.2)              |           |
| Black                                  | 39.2      | -15.0 (-26.3,-3.7)            | 0.009    | 62.1      | 22.8 (15.0,30.7)                 | 2.4 (-9.8,14.6)              |           |
| Hispanic/Latino                        | 54.9      | 0.6 (-11.6,12.9)              | 0.917    | 67.4      | 12.5 (4.2,20.8)                  | -7.9 (-20.5,4.6)             |           |
| <u>BMI (kg/m<sup>2</sup>)</u>          |           |                               |          |           |                                  |                              |           |
| South Asian                            | 26.4      | (Ref)                         |          | 28.3      | 2.0 (1.2,2.7)                    | (Ref)                        |           |
| White                                  | 27.3      | 0.9 (-0.1,2.0)                | 0.086    | 28.3      | 1.0 (0.7,1.3)                    | -1.0 (-1.9,-0.2)             | 0.018     |
| Chinese                                | 23.9      | -2.4 (-3.9,-1.0)              | 0.001    | 23.7      | -0.2 (-0.8,0.4)                  | -2.2 (-3.2,-1.3)             | <0.001    |
| Black                                  | 31.3      | 5.0 (3.8,6.1)                 | <0.001   | 32.7      | 1.4 (1.0,1.8)                    | -0.6 (-1.5,0.2)              | 0.149     |
| Hispanic/Latino                        | 29.6      | 3.3 (2.0,4.6)                 | <0.001   | 30.8      | 1.2 (0.8,1.6)                    | -0.8 (-1.7,0.0)              | 0.062     |

\* P-value < 0.05 from a pairwise test at age 45 vs. South Asians; \*\* P-value from a test of change from age 45 to 55 vs. South Asian. When the multivariate test was not significant, pairwise tests were not performed.

**Table 4: Behavioral Risk Factors Stratified by Age and Race and Ethnic Group in Men, MASALA vs. MESA Groups**

|                                  | Age<br>45 | Group vs SA at age<br>45 (CI) | P-value* | Age<br>55 | Change from age<br>45 to 55 (CI) | Difference in<br>Change (CI) | P-value** |
|----------------------------------|-----------|-------------------------------|----------|-----------|----------------------------------|------------------------------|-----------|
| <u>AHEI Diet Score</u>           |           |                               |          |           |                                  |                              |           |
| South Asian                      | 66.1      | (Ref)                         |          | 69.5      | 3.4 (1.5,5.2)                    | (Ref)                        |           |
| White                            | 48.3      | -17.8 (-20.1,-15.6)           | <0.001   | 55.4      | 7.1 (5.1,9.1)                    | 3.8 (1.1,6.4)                | 0.006     |
| Chinese                          | 55.8      | -10.3 (-13.8,-6.8)            | <0.001   | 60.5      | 4.7 (1.0,8.3)                    | 1.3 (-2.7,5.4)               | 0.523     |
| Black                            | 49.8      | -16.3 (-19.2,-13.5)           | <0.001   | 53.6      | 3.8 (0.9,6.7)                    | 0.5 (-2.9,3.9)               | 0.792     |
| Hispanic/Latino                  | 50.2      | -16.0 (-18.6,-13.3)           | <0.001   | 55.7      | 5.5 (3.2,7.9)                    | 2.2 (-0.8,5.2)               | 0.150     |
| <u>Alcohol Use (%)</u>           |           |                               |          |           |                                  |                              |           |
| South Asian                      | 39.3      | (Ref)                         |          | 41.1      | 1.8 (-7.0,10.6)                  | (Ref)                        | 0.728     |
| White                            | 64.2      | 24.9 (15.7,34.2)              | <0.001   | 62.0      | -2.2 (-9.4,5.0)                  | -4.0 (-15.4,7.3)             |           |
| Chinese                          | 34.5      | -4.8 (-19.3,9.8)              | 0.521    | 29.4      | -5.2 (-18.9,8.5)                 | -7.0 (-23.3,9.3)             |           |
| Black                            | 50.5      | 11.2 (-1.9, 24.3)             | 0.094    | 42.4      | -8.1 (-20.5,4.3)                 | -9.9 (-25.2,5.3)             |           |
| Hispanic/Latino                  | 55.6      | 0.163 (4.3,28.2)              | 0.008    | 50.7      | -4.8 (-15.4,5.6)                 | -6.7 (-20.4,7.0)             |           |
| <u>Exercise (MET<br/>min/wk)</u> |           |                               |          |           |                                  |                              |           |
| South Asian                      | 1082      | (Ref)                         |          | 1437      | 355 (-194,905)                   | (Ref)                        |           |
| White                            | 878       | -204 (-801,392)               | 0.502    | 1873      | 995 (525,1464)                   | 639 (-83,1362)               | 0.083     |
| Chinese                          | 105       | -977 (-1822,-132)             | 0.023    | 1711      | 1605 (818,2393)                  | 1250 (289,2211)              | 0.011     |
| Black                            | 1604      | 522 (-172,1216)               | 0.140    | 2686      | 1082 (478,1685)                  | 726 (-89,1542)               | 0.081     |
| Hispanic/Latino                  | 1604      | 521 (-154,1197)               | 0.130    | 2277      | 674 (126,1222)                   | 319 (-457,1095)              | 0.421     |

\* P-value < 0.05 from a pairwise test at age 45 vs. South Asians; \*\* P-value from a test of change from age 45 to 55 vs. South Asian. When the multivariate test was not significant, pairwise tests were not performed.

**Table 5: Behavioral Risk Factors Stratified by Age and Race and Ethnic Group in Women, MASALA vs. MESA groups**

|                                  | Age<br>45 | Group vs SA at age<br>45 (CI) | P-value* | Age<br>55 | Change from age<br>45 to 55 (CI) | Difference in<br>Change (CI) | P-value** |
|----------------------------------|-----------|-------------------------------|----------|-----------|----------------------------------|------------------------------|-----------|
| <b>AHEI Diet Score</b>           |           |                               |          |           |                                  |                              |           |
| South Asian                      | 68.5      | (Ref)                         |          | 71.8      | 3.35 (1.5,5.2)                   | (Ref)                        |           |
| White                            | 51.5      | -17 (-19.2,-14.7)             | <0.001   | 58.5      | 7.02 (5.2,8.9)                   | 3.67 (1.0,6.3)               | 0.006     |
| Chinese                          | 58.6      | -9.8 (-13.1,-6.6)             | <0.001   | 64.6      | 5.94 (2.7,9.2)                   | 2.59 (-1.2,6.3)              | 0.176     |
| Black                            | 47.7      | -21 (-23.3,-18.2)             | <0.001   | 53.5      | 5.78 (3.5,8.1)                   | 2.43 (-0.5,5.4)              | 0.106     |
| Hispanic/Latino                  | 50.3      | -18.2 (-20.8,-15.6)           | <0.001   | 56.6      | 6.32 (4.1,8.5)                   | 2.97 (0.1,5.9)               | 0.045     |
| <b>Alcohol Use (%)</b>           |           |                               |          |           |                                  |                              |           |
| South Asian                      | 18.6      | (Ref)                         |          | 17.4      | -1.2 (-7.0,4.6)                  | (Ref)                        | 0.051     |
| White                            | 42.8      | 24.1 (16.0,32.4)              | <0.001   | 46.7      | 3.8 (-3.8,11.5)                  | 5.0 (-4.5,14.6)              |           |
| Chinese                          | 25.8      | 0.072 (-4.4,18.7)             | 0.226    | 14.8      | -11.0 (-23.4,1.4)                | -9.8 (-23.5,3.9)             |           |
| Black                            | 30.7      | 0.120 (4.1,20.0)              | 0.003    | 21.4      | -9.2 (-16.4, -2.1)               | -8.1 (-17.3,1.1)             |           |
| Hispanic/Latino                  | 32.4      | 0.137 (4.8,22.7)              | 0.002    | 23.8      | -8.6 (-16.5, -0.7)               | -7.4 (-17.2,2.3)             |           |
| <b>Exercise (MET<br/>min/wk)</b> |           |                               |          |           |                                  |                              |           |
| South Asian                      | 1226      | (Ref)                         |          | 1429      | 203 (-263, 670)                  | (Ref)                        |           |
| White                            | 989       | -237 (-718, 243)              | 0.334    | 1597      | 608 (242, 974)                   | 405 (-188, 998)              | 0.181     |
| Chinese                          | 407       | -819 (-1503, -136)            | 0.019    | 1267      | 861 (204, 1518)                  | 657 (-148, 1463)             | 0.110     |
| Black                            | 1063      | -163 (-689, 362)              | 0.542    | 2025      | 962 (525, 1400)                  | 759 (119, 1399)              | 0.020     |
| Hispanic/Latino                  | 950       | -276 (-815, 264)              | 0.316    | 1609      | 659 (219, 1098)                  | 455 (-185, 1096)             | 0.164     |

\* P-value < 0.05 from a pairwise test at age 45 vs. South Asians; \*\* P-value from a test of change from age 45 to 55 vs. South Asian. When the multivariate test was not significant, pairwise tests were not performed.

## APPENDIX: STATISTICAL METHODS

### A CONTINUOUS RISK FACTORS

#### A.1 MODEL

Let  $y_{ij}$  be the risk factor for participant  $i$  ( $i = 1, \dots, n$ ) measured at exam  $j$  ( $j = 1, \dots, J_i$ ). For continuous risk factors (BMI, diet score, physical activity) we fit the following linear mixed-effects model:

$$\begin{aligned}
 y_{ij} = & \beta_0 + \beta_1 age_{ij} + \beta_2 age_{ij}^2 + \beta_3 edu_i + \beta_4 ins_i + \beta_5 white_i + \beta_6 black_i \\
 & + \beta_7 chinese_i + \beta_8 hisp_i + \beta_9 (age_{ij} * white_i) + \beta_{10} (age_{ij} * black_i) \\
 & + \beta_{11} (age_{ij} * chinese_i) + \beta_{12} (age_{ij} * hisp_i) + \beta_{13} (age_{ij}^2 * white_i) \\
 & + \beta_{14} (age_{ij}^2 * black_i) + \beta_{15} (age_{ij}^2 * chinese_i) + \beta_{16} (age_{ij}^2 * hisp_i) \\
 & + b_{0i} + \varepsilon_{ij}
 \end{aligned} \tag{1}$$

where  $age_{ij}$  is the age of participant  $i$  at exam  $j$ ,  $edu_i$  is a vector of indicator variables for the education categories in Table 1,  $ins_i$  is a vector of indicator variables for the insurance categories in Table 1, and  $white_i$ ,  $black_i$ ,  $chinese_i$ , and  $hisp_i$  are indicator variables for race (the reference race is South Asians). The model also includes age by race interaction terms as well as age squared by race interaction terms. The parameters  $b_{0i}$  and  $\varepsilon_{ij}$  are independent random subject-specific intercept and error terms each normally distributed with variance  $\sigma_b^2$  and,  $\sigma_\varepsilon^2$  respectively.

#### A.2 PREDICTIVE MARGINAL MEANS

To calculate the risk factor means by age and race controlling for the effects of education and insurance status, we use the method of predictive marginal means [1]. For example, to obtain the mean risk factor level at age 45 for whites, we set  $age_{ij} = 45$ ,  $age_{ij}^2 = 45^2$  and  $white_i = 1$  and perform the following calculation, using the estimated coefficients ( $\beta$ 's) from the model in (1) and the empirical Bayes estimates of the random effects ( $\hat{b}_{0i}$ ). That is,

$$\hat{\mu}_W^{45} = \frac{1}{n} \sum_{i=1}^n \hat{\beta}_0 + \hat{\beta}_1 45 + \hat{\beta}_2 (45^2) + \hat{\beta}_3 edu_i + \hat{\beta}_4 ins_i + \hat{\beta}_5 + \hat{\beta}_9 45 + \hat{\beta}_{13} (45^2) + \hat{b}_{0i}. \tag{2}$$

Similar calculations can be performed to obtain predicted means for the other race/ethnic groups at age 45 and age 55.

## B BINARY RISK FACTORS

### B.1 MODEL

The model for binary risk factors (hypertension, dyslipidemia, diabetes, alcohol use) is similar to that in (1) except we now use a mixed-effects logistic regression model of the probability ( $p_{ij}$ ) that participant  $i$  has the risk factor at exam  $j$ . That is,

$$\begin{aligned} \log\left(\frac{p_{ij}}{1-p_{ij}}\right) = & \beta_0 + \beta_1 age_{ij} + \beta_2 age_{ij}^2 + \beta_3 edu_i + \beta_4 ins_i + \beta_5 White_i + \beta_6 Black_i \\ & + \beta_7 Chinese_i + \beta_8 Hsp_i + \beta_9 (age_{ij} * White_i) + \beta_{10} (age_{ij} * Black_i) \\ & + \beta_{11} (age_{ij} * Chinese_i) + \beta_{12} (age_{ij} * Hsp_i) + \beta_{13} (age_{ij}^2 * White_i) \\ & + \beta_{14} (age_{ij}^2 * Black_i) + \beta_{15} (age_{ij}^2 * Chinese_i) + \beta_{16} (age_{ij}^2 * Hsp_i) \\ & + b_{0i} \end{aligned} \quad (3)$$

where as in (1) the parameter  $b_{0i}$  is a random intercept term for participant  $i$ .

### B.2 PREDICTIVE MARGINAL MEANS (PROBABILITIES)

Predictive marginal means for the model in (3) can be calculated similar to that in (2). Again, using the example of a White participant at age 45 we calculate the following quantity:

$$\hat{\eta}_W^{45} = \frac{1}{n} \sum_{i=1}^n \hat{\beta}_0 + \hat{\beta}_1 45 + \hat{\beta}_2 (45^2) + \hat{\beta}_3 edu_i + \hat{\beta}_4 ins_i + \hat{\beta}_5 + \hat{\beta}_9 45 + \hat{\beta}_{13} (45^2) + \hat{b}_{0i}.$$

which is the log odds that a white participant has the risk factor at age 45. To put it on the probability scale, we apply the inverse logit transformation:

$$\hat{\mu}_W^{45} = \frac{e^{\hat{\eta}_W^{45}}}{1 + e^{\hat{\eta}_W^{45}}}$$

## C CONTRASTS

### C.1 CONTRASTS AT AGE 45

The first set of contrasts compare predicted marginal mean outcomes at age 45 of White (W), Chinese (C), Black (B), and Hispanics/Latino (H) versus South Asians (SA). We first performed an overall (Wald) test of whether any of these contrasts were significant. That is

$$\begin{aligned} H_0 : (\mu_W^{45} - \mu_{SA}^{45}) &= (\mu_C^{45} - \mu_{SA}^{45}) = (\mu_B^{45} - \mu_{SA}^{45}) = (\mu_H^{45} - \mu_{SA}^{45}) = 0 \\ H_1 : (\mu_W^{45} - \mu_{SA}^{45}) &or (\mu_C^{45} - \mu_{SA}^{45}) or (\mu_B^{45} - \mu_{SA}^{45}) or (\mu_H^{45} - \mu_{SA}^{45}) \neq 0 \end{aligned} \quad (4)$$

Only if the overall test in (4) is rejected did we perform the four separate comparisons.

### C.1 SLOPE CONTRASTS

The second set of contrasts compares the change in risk factor levels from age 45 to 55 in South Asians versus the four other race/ethnic groups. Let  $\Delta_R$  be the change in predicted risk factor means from age 45 to age 55 for race/ethnic group  $R$ . That is

$$\Delta_R = \mu_R^{55} - \mu_R^{45}$$

As with the baseline contrasts, we first performed an overall (Wald) test of whether any of the slopes in White, Chinese, Black, and Latino people were significantly different from the South Asian slope, that is

$$\begin{aligned} H_0 : (\Delta_W - \Delta_{SA}) &= (\Delta_C - \Delta_{SA}) = (\Delta_B - \Delta_{SA}) = (\Delta_H - \Delta_{SA}) = 0 \\ H_1 : (\Delta_W - \Delta_{SA}) &or (\Delta_C - \Delta_{SA}) or (\Delta_B - \Delta_{SA}) or (\Delta_H - \Delta_{SA}) \neq 0 \end{aligned} \quad (5)$$

Only if the overall test in (5) is rejected did we perform the four separate tests comparing the rate of change in the four MESA race/ethnic groups to South Asians.

## Sources Cited

1. Prasad DS, Kabir Z, Dash AK and Das BC. Childhood cardiovascular risk factors in South Asians: A cause of concern for adult cardiovascular disease epidemic. *Ann Pediatr Cardiol*. 2011;4:166-71.
2. Stanford South Asian Translational Heart Initiative.
3. Gupta K, Modi S and Ananthasubramaniam K. Toward Understanding Cardiovascular Risk Burden in South Asians: A Major Step Forward. *JACC Asia*. 2022;2:912-915.
4. Kanaya AM, Kandula N, Herrington D, Budoff MJ, Hulley S, Vittinghoff E and Liu K. Mediators of Atherosclerosis in South Asians Living in America (MASALA) study: objectives, methods, and cohort description. *Clin Cardiol*. 2013;36:713-720.
5. Bild DE, Bluemke DA, Burke GL, Detrano R, Diez Roux AV, Folsom AR, Greenland P, Jacob DR, Jr., Kronmal R, Liu K, Nelson JC, O'Leary D, Saad MF, Shea S, Szklo M and Tracy RP. Multi-Ethnic Study of Atherosclerosis: objectives and design. *Am J Epidemiol*. 2002;156:871-81.
6. Lloyd-Jones DM, Allen NB, Anderson CAM, Black T, Brewer LC, Foraker RE, Grandner MA, Lavretsky H, Perak AM, Sharma G, Rosamond W and American Heart A. Life's Essential 8: Updating and Enhancing the American Heart Association's Construct of Cardiovascular Health: A Presidential Advisory From the American Heart Association. *Circulation*. 2022;146:e18-e43.
7. Kanaya AM, Herrington D, Vittinghoff E, Ewing SK, Liu K, Blaha MJ, Dave SS, Qureshi F and Kandula NR. Understanding the high prevalence of diabetes in U.S. south Asians compared with four racial/ethnic groups: the MASALA and MESA studies. *Diabetes Care*. 2014;37:1621-8.
8. Gujral UP, Vittinghoff E, Mongraw-Chaffin M, Vaidya D, Kandula NR, Allison M, Carr J, Liu K, Narayan KMV and Kanaya AM. Cardiometabolic Abnormalities Among Normal-Weight Persons From Five Racial/Ethnic Groups in the United States: A Cross-sectional Analysis of Two Cohort Studies. *Ann Intern Med*. 2017;166:628-636.
9. Rodriguez LA, Jin Y, Talegawkar SA, Otto MCO, Kandula NR, Herrington DM and Kanaya AM. Differences in Diet Quality among Multiple US Racial/Ethnic Groups from the Mediators of Atherosclerosis in South Asians Living in America (MASALA) Study and the Multi-Ethnic Study of Atherosclerosis (MESA). *J Nutr*. 2020;150:1509-1515.
10. Chobanian AV, Bakris GL, Black HR, Cushman WC, Green LA, Izzo JL, Jr., Jones DW, Materson BJ, Oparil S, Wright JT, Jr., Roccella EJ, Joint National Committee on Prevention DE, Treatment of High Blood Pressure. National Heart L, Blood I and National High Blood Pressure Education Program Coordinating C. Seventh report of the Joint National Committee on Prevention, Detection, Evaluation, and Treatment of High Blood Pressure. *Hypertension*. 2003;42:1206-52.
11. Genuth S, Alberti KG, Bennett P, Buse J, Defronzo R, Kahn R, Kitzmiller J, Knowler WC, Lebovitz H, Lernmark A, Nathan D, Palmer J, Rizza R, Saudek C, Shaw J, Steffes M, Stern M, Tuomilehto J, Zimmet P, Expert Committee on the D and Classification of Diabetes M. Follow-up report on the diagnosis of diabetes mellitus. *Diabetes Care*. 2003;26:3160-7.
12. Expert Panel on Detection E and Treatment of High Blood Cholesterol in A. Executive Summary of The Third Report of The National Cholesterol Education Program (NCEP) Expert Panel on Detection, Evaluation, And Treatment of High Blood Cholesterol In Adults (Adult Treatment Panel III). *JAMA*. 2001;285:2486-97.



13. Consultation WHOE. Appropriate body-mass index for Asian populations and its implications for policy and intervention strategies. *Lancet*. 2004;363:157-63.
14. Defining Adult Overweight & Obesity.
15. Ainsworth BE, Irwin ML, Addy CL, Whitt MC and Stolarczyk LM. Moderate physical activity patterns of minority women: the Cross-Cultural Activity Participation Study. *J Womens Health Gen Based Med*. 1999;8:805-13.
16. Williams R. Using the margins command to estimate and interpret adjusted predictions and marginal effects. *The Stata Journal*. 2012;12:308–331.
17. Stata 18 Base Reference Manual [computer program]. College Station, TX: Stata Press; 2023.
18. Nair MP, D. Why Do South Asians Have High Risk for CAD? *Global Heart* 2012;7:307-314.
19. Patel M, Phillips-Caesar E and Boutin-Foster C. Barriers to lifestyle behavioral change in migrant South Asian populations. *J Immigr Minor Health*. 2012;14:774-85.
20. Zhu X, Liu J, Sevoyan M and Pate RR. Acculturation and leisure-time physical activity among Asian American adults in the United States. *Ethn Health*. 2022;27:1900-1914.
21. Dave SS, Craft LL, Mehta P, Naval S, Kumar S and Kandula NR. Life stage influences on U.S. South Asian women's physical activity. *Am J Health Promot*. 2015;29:e100-8.
22. Maresova P, Javanmardi E, Barakovic S, Barakovic Husic J, Tomsone S, Krejcar O and Kuca K. Consequences of chronic diseases and other limitations associated with old age - a scoping review. *BMC Public Health*. 2019;19:1431.
23. Gil-Salcedo A, Dugravot A, Fayosse A, Dumurgier J, Bouillon K, Schnitzler A, Kivimaki M, Singh-Manoux A and Sabia S. Healthy behaviors at age 50 years and frailty at older ages in a 20-year follow-up of the UK Whitehall II cohort: A longitudinal study. *PLoS Med*. 2020;17:e1003147.
24. Guo A, Jin H, Mao J, Zhu W, Zhou Y, Ge X and Yu D. Impact of health literacy and social support on medication adherence in patients with hypertension: a cross-sectional community-based study. *BMC Cardiovasc Disord*. 2023;23:93.
